# Supplementary material for: PathoScope 2.0: a complete computational framework for strain identification in environmental or clinical sequencing samples
Source: PubMed Central journal article supplement (PMC4164323; doi:10.1186/2049-2618-2-33), 2014-09-05
Supplement: 2049-2618-2-33-S3.pdf [file 2049-2618-2-33-S3.pdf]

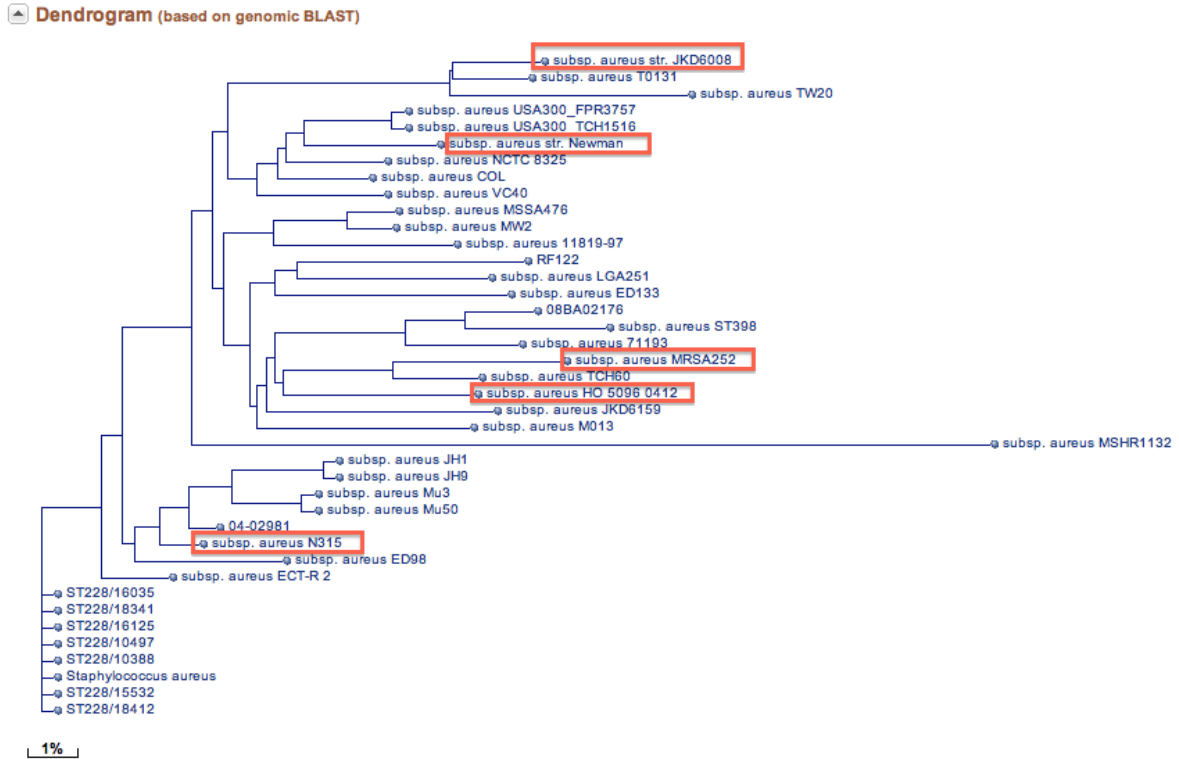

**Supplementary Figure 1: Phylogenetic relationships of the *S. aureus* genomes used in the simulation study.** The genomes that are highlighted in red boxes were used for generating the reads. This image was obtained and modified from the NCBI: <http://www.ncbi.nlm.nih.gov/genome/?term=staphylococcus%20aureus>.

▲ Dendrogram (based on genomic BLAST)

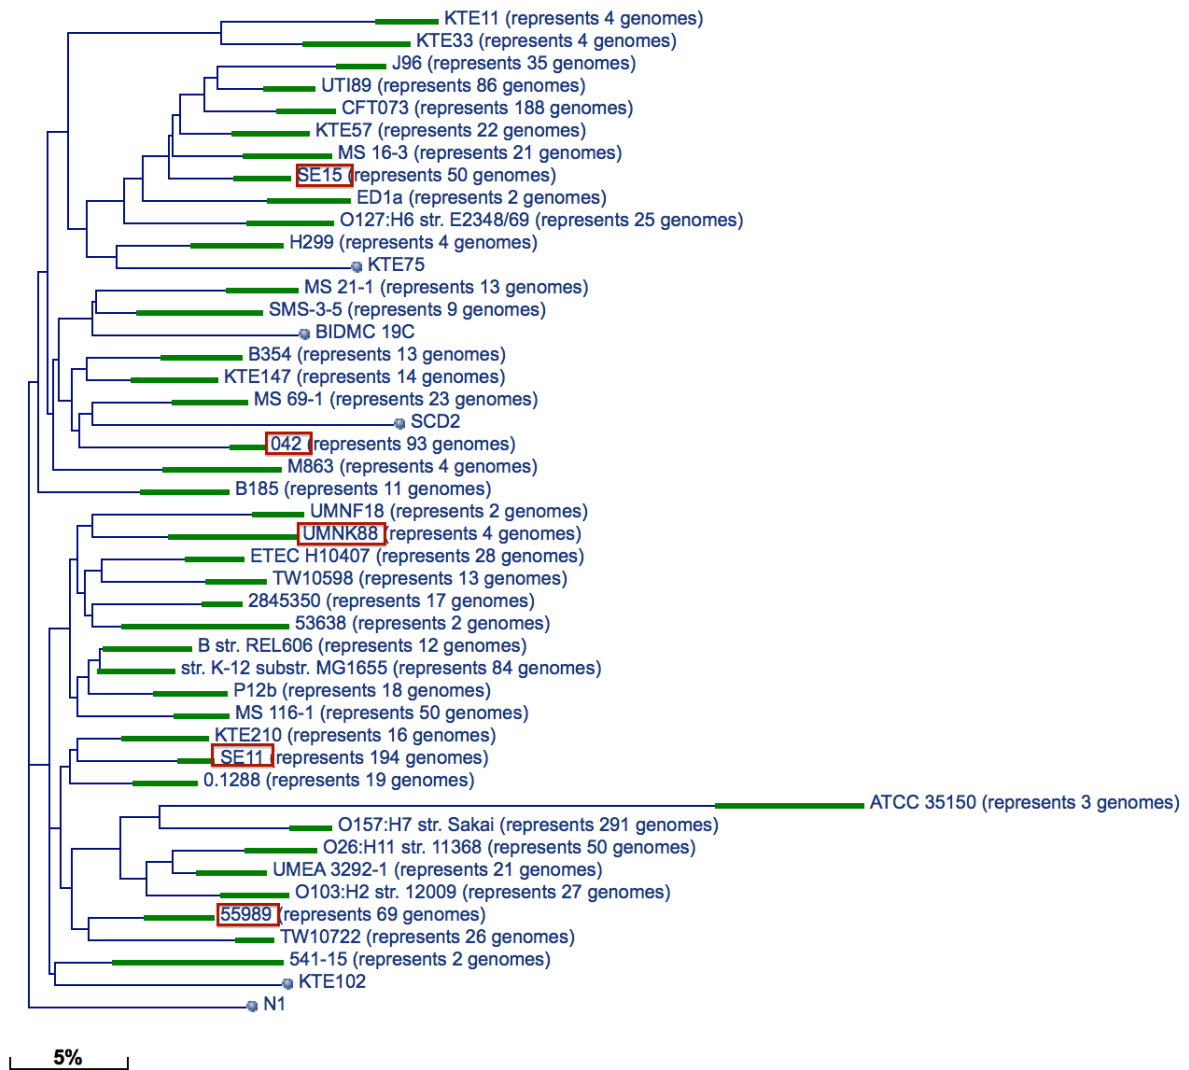

**Supplementary Figure 2: Phylogenetic relationships of the *E. coli* genomes used in the simulation study.** The genomes that are highlighted in red boxes were used for generating the reads. This image was obtained and modified from the NCBI:

<http://www.ncbi.nlm.nih.gov/genome/?term=escherichia%20coli>

Dendrogram (based on genomic BLAST)

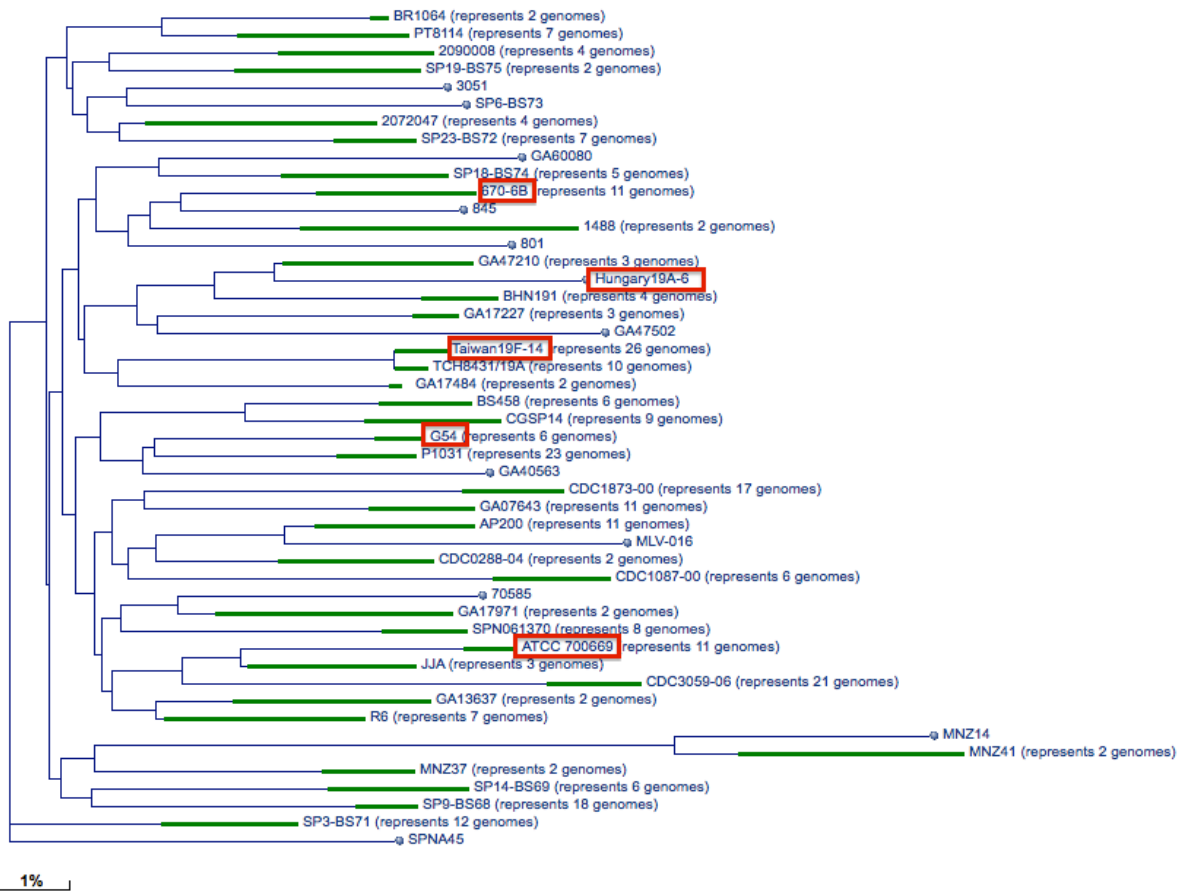

**Supplementary Figure 3: Phylogenetic relationships of the *E. coli* genomes used in the simulation study.** The genomes that are highlighted in red boxes were used for generating the reads. This image was obtained and modified from the NCBI:

<http://www.ncbi.nlm.nih.gov/genome/?term=streptococcus%20pneumoniae>
