# Supplementary material for: PathoScope 2.0: a complete computational framework for strain identification in environmental or clinical sequencing samples
Source: PubMed Central journal article supplement (PMC4164323; doi:10.1186/2049-2618-2-33), 2014-09-05
Supplement: 2049-2618-2-33-S4.pdf [file 2049-2618-2-33-S4.pdf]

**Supplementary Table 1: Parameter values used for the *E. coli* study.**

| <b>Method</b>  | <b>Parameter Settings</b>                                                                                                                                                                                                                                                        |
|----------------|----------------------------------------------------------------------------------------------------------------------------------------------------------------------------------------------------------------------------------------------------------------------------------|
| PathoScope 2.0 | PathoLib: -taxonIds 562 --subTax<br>PathoMap: -targetAlignParams "--very-sensitive-local -k 500 --score-min L,205,0.0"<br>PathoID: default settings<br>PathoReport: --contig                                                                                                     |
| PathoScope 1.0 | default settings                                                                                                                                                                                                                                                                 |
| ReadScan       | index: -k 13 -s 6<br>smalt: -d -1 -y 0.94 -n 2 -f samsoft                                                                                                                                                                                                                        |
| RINS           | bowtie_mismatch = 3<br>paired_fragment_length = 350<br>min_contig_length = 300<br>trinity_threads = 10<br>blastn_evalue_thrd = 0.05<br>similarity_thrd = 0.8<br>iteration = 2<br>raw_read_length = 150<br>chop_read_length = 25<br>minIdentity = 80<br>compress_ratio_thrd = 0.5 |
